# Supplementary material for: A CRISPR/Cas9-Based Assay for High-Throughput Studies of Cancer-Induced Innervation
Source: MDPI journal article supplement (doi:10.3390/cancers15072026), 2023-03-29
Supplement: s1 [file s1]

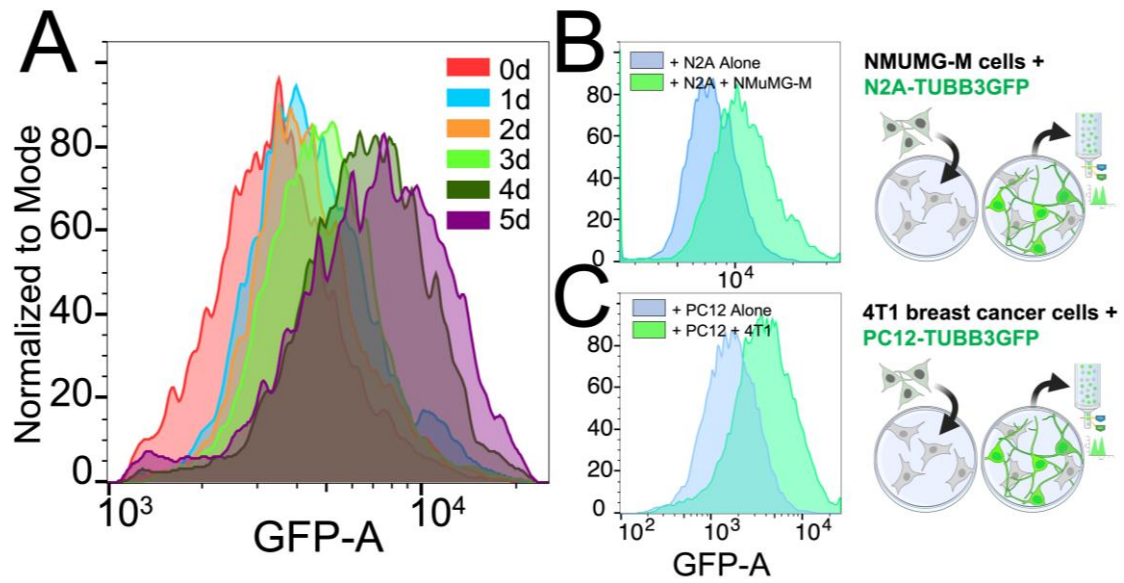

**Figure S1.** Neuro2A and PC12 models of neuronal differentiation. (A) Flow cytometry analysis of the time response of the neuronal differentiation process in the Neuro2A cell model (N2A-TUBB3-GFP) stimulated with NGF (100 ng/mL) for 0 to 5 days. (B) N2A-TUBB3-GFP cells were cultivated as unstimulated monoculture (Alone) and incubated in direct coculture with NMuMG-M cells (+NMuMG). (C) PC12-TUBB3-GFP cells were cultivated as unstimulated monoculture (Alone) and incubated in direct coculture with 4T1 breast cancer cells (+4T1).
