# Supplementary figures and images for: A CRISPR/Cas9-Based Assay for High-Throughput Studies of Cancer-Induced Innervation
Source: MDPI journal article supplement (doi:10.3390/cancers15072026), 2023-03-29

FIGURE 3

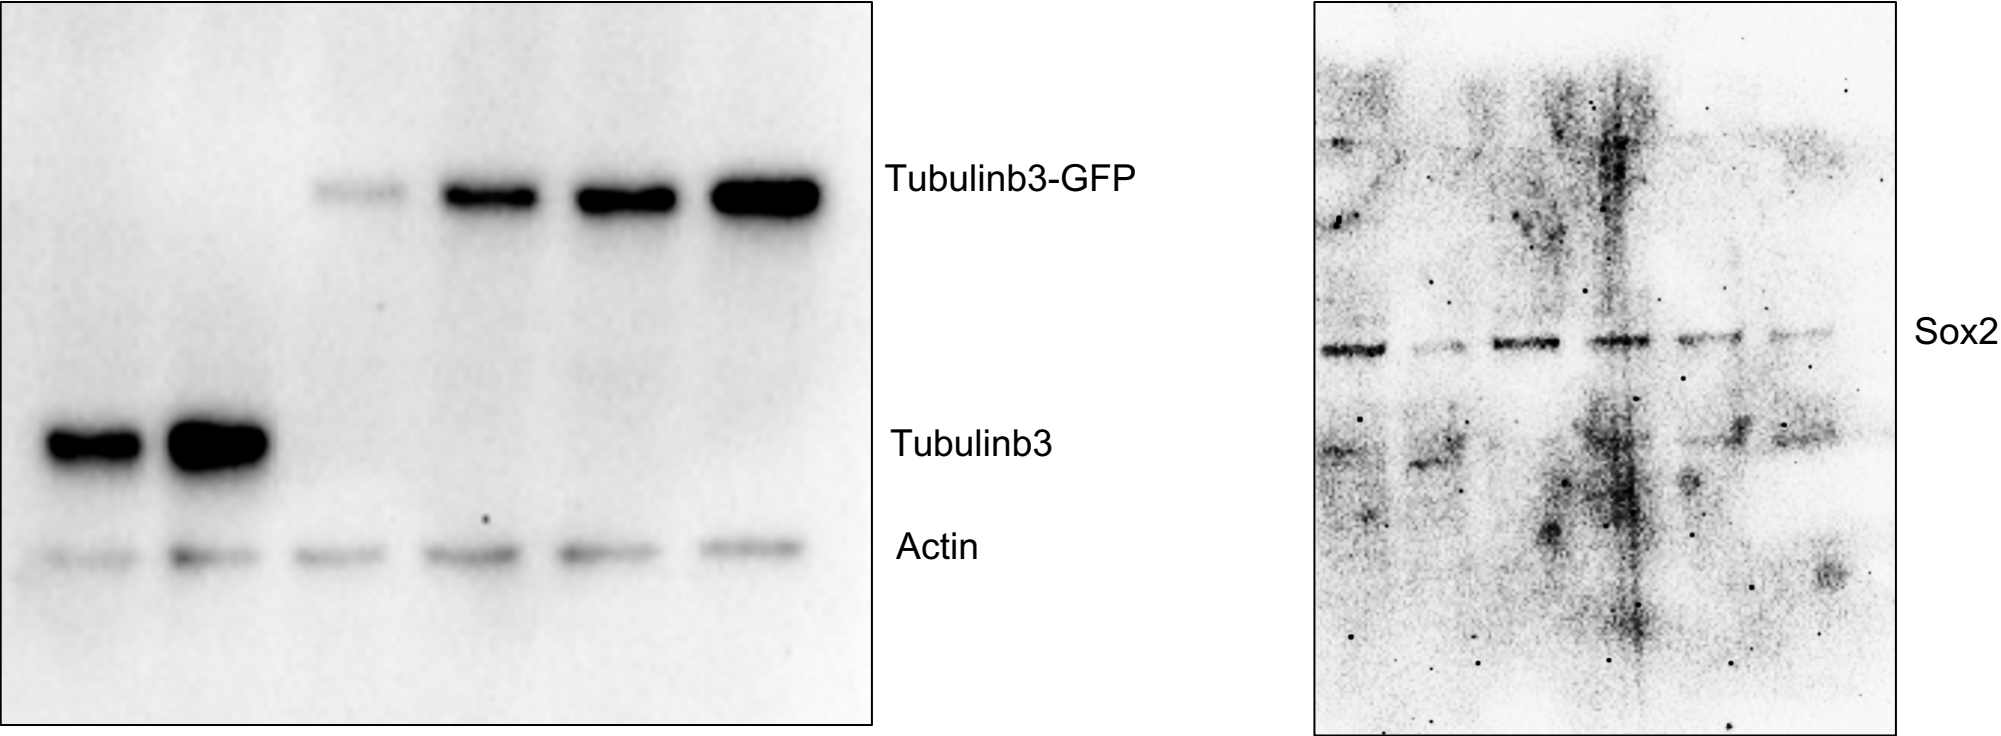

FIGURE 5

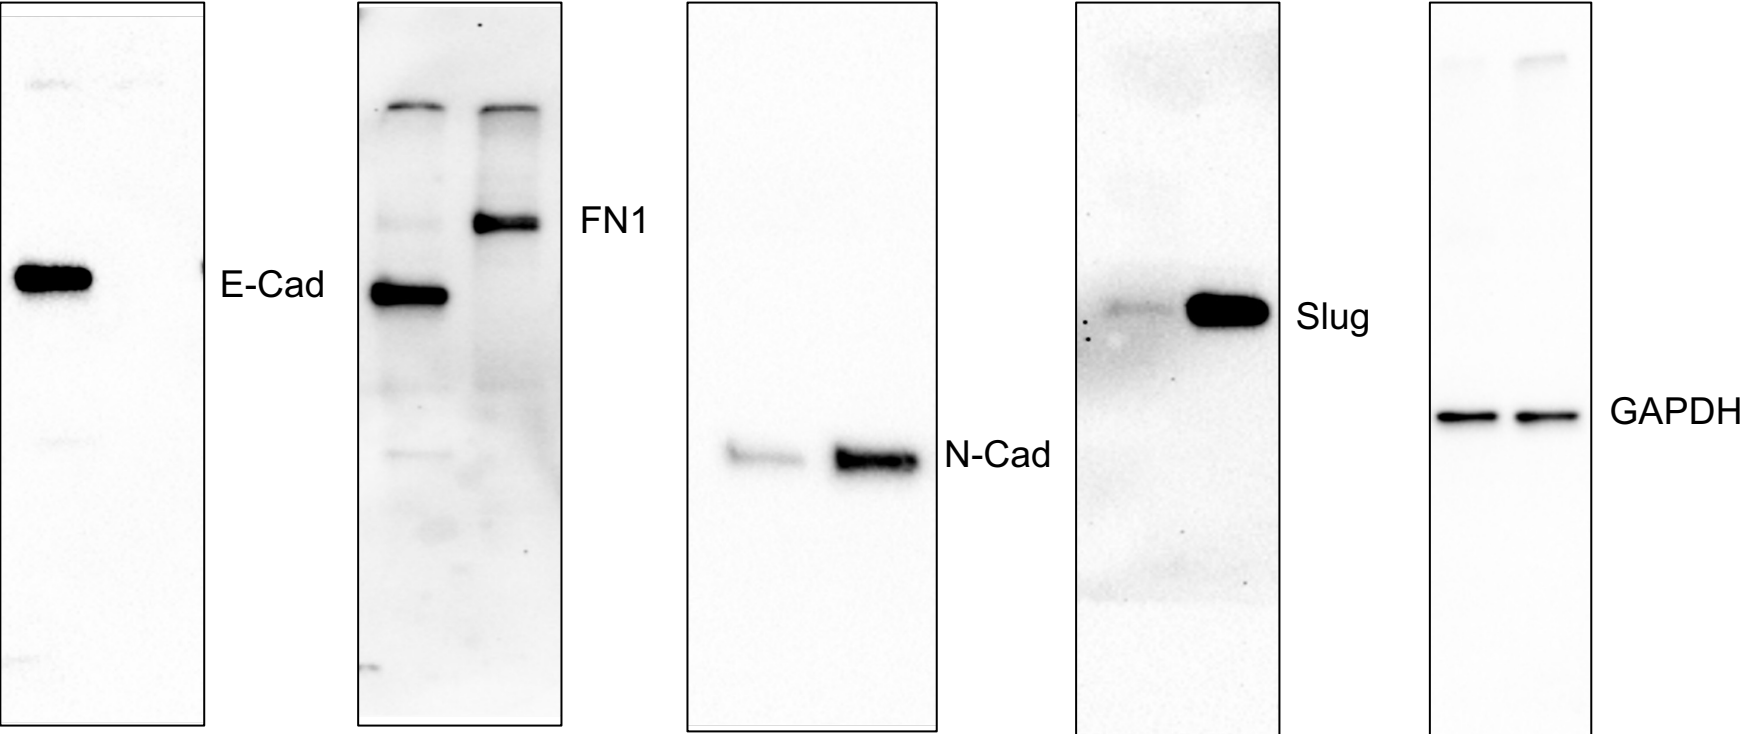

Supplement: s1 [file s1]
